# Supplementary material for: 18α-Glycyrrhetinic acid aggregation-induced emission probes for visual fluorescence detection of explosive as well multi-functional applications
Source: Royal Society of Chemistry journal article supplement (doi:10.1039/d1nj05502j), 2021-12-20
Supplement: d1nj05502j1.pdf [file d1nj05502j1.pdf]

# 18 $\alpha$ -Glycyrrhetic Acid Aggregation-Induced Emission Probes for Visual Fluorescence Detection of Explosive as well Multi-functional Application

Cheng Zhang <sup>a</sup>, Siyao Cheng <sup>a</sup>, Qiu Zhuang <sup>a</sup>, Aming Xie <sup>b\*</sup>, Wei Dong <sup>a\*</sup>

<sup>a</sup> School of Chemical Engineering, Nanjing University of Science and Technology,  
Nanjing, Jiangsu Province, China.

<sup>b</sup> School of Mechanical Engineering, Nanjing University of Science and Technology, Nanjing  
210094, China.

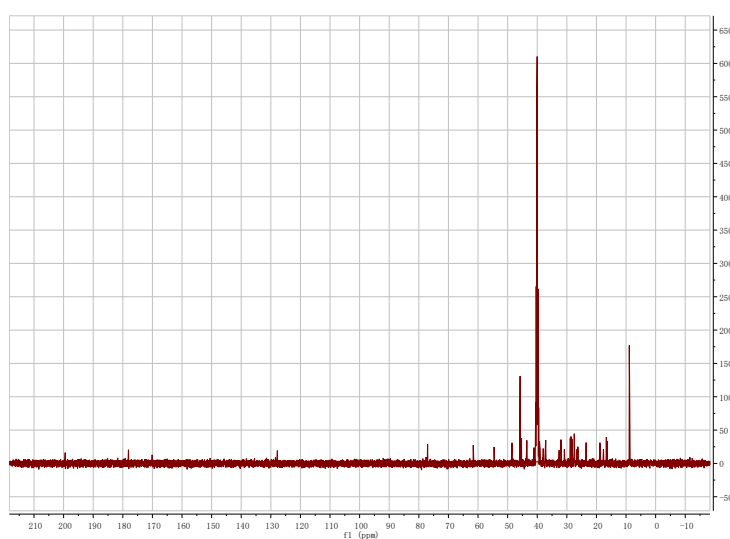

**Fig. S1.** <sup>13</sup>C NMR spectrum of compound TGL1 in *d*-DMSO.

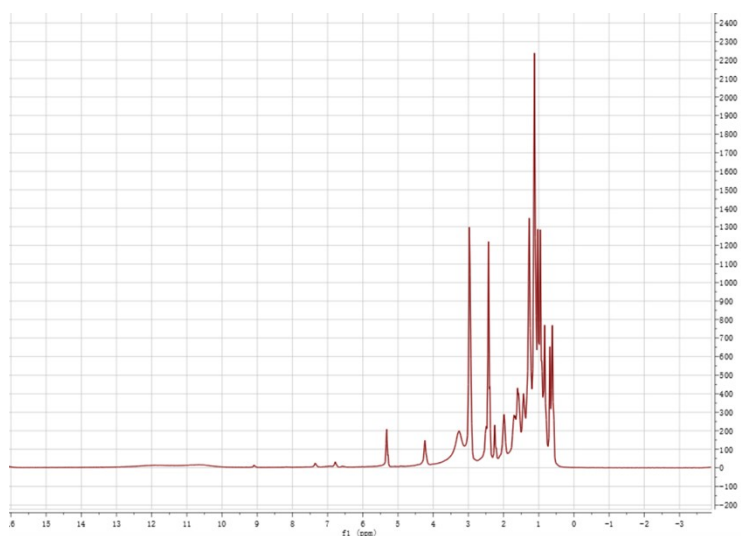

\* Corresponding author. [weidong@njust.edu.cn](mailto:weidong@njust.edu.cn) (W. Dong) ; [xieaming@njust.edu.cn](mailto:xieaming@njust.edu.cn)

**Fig. S2.**  $^1\text{H}$  NMR spectrum of compound TGL1 in *d*-DMSO.

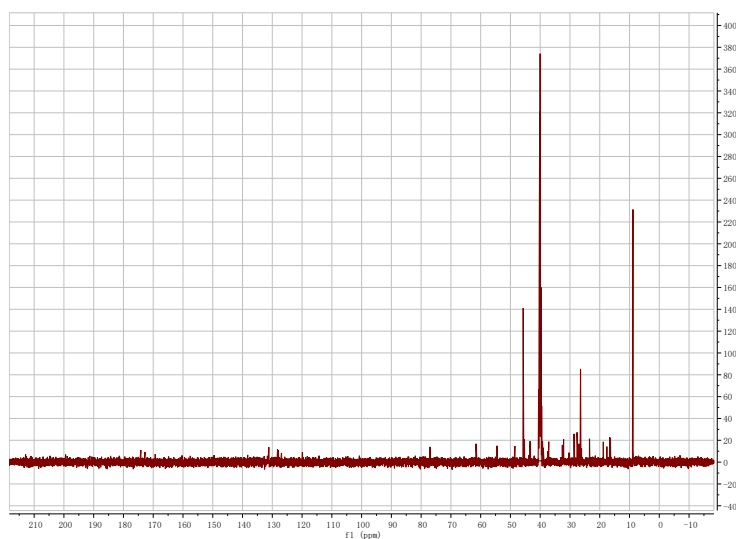

**Fig. S3.**  $^{13}\text{C}$  NMR spectrum of compound TGL2 in *d*-DMSO.

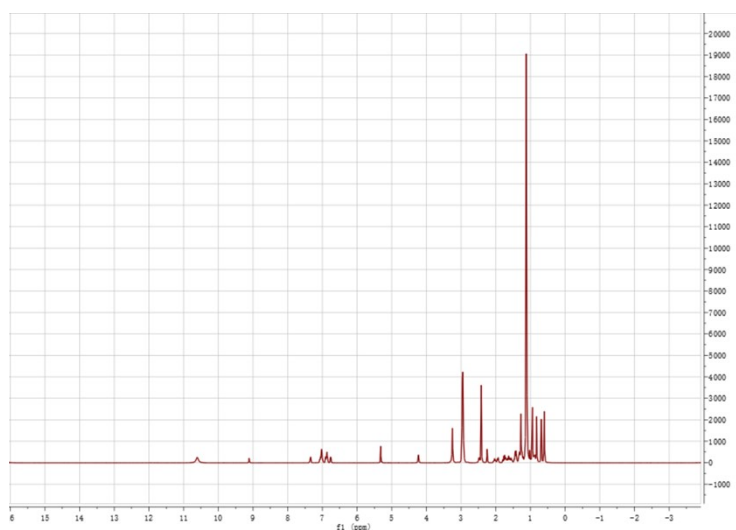

**Fig. S4.**  $^1\text{H}$  NMR spectrum of compound TGL2 in *d*-DMSO.

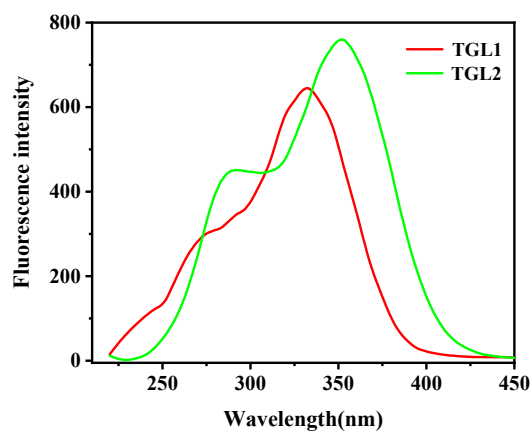

**Fig. S5.** The excitation spectra of the probes in DMSO/H<sub>2</sub>O (1:9, v/v).

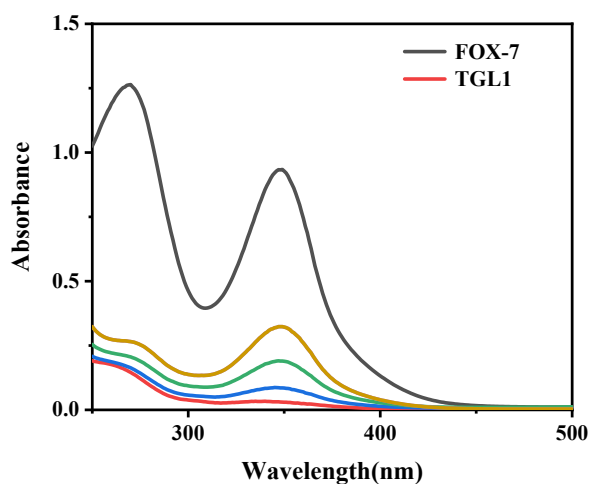

**Fig. S6.** The change of the UV-visible absorption of TGL1 in DMSO/H<sub>2</sub>O (1:9, v/v) with the increase of FOX-7, Concentration: 10<sup>-5</sup>M.

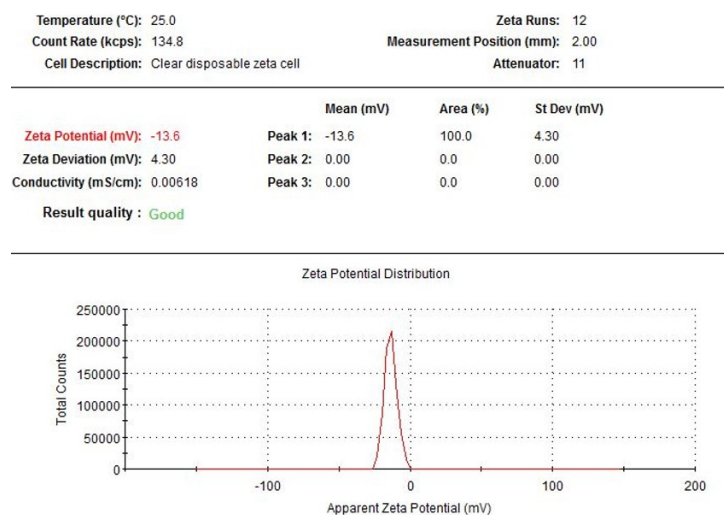

**Fig. S7.** The zeta potential distribution of TGL1.

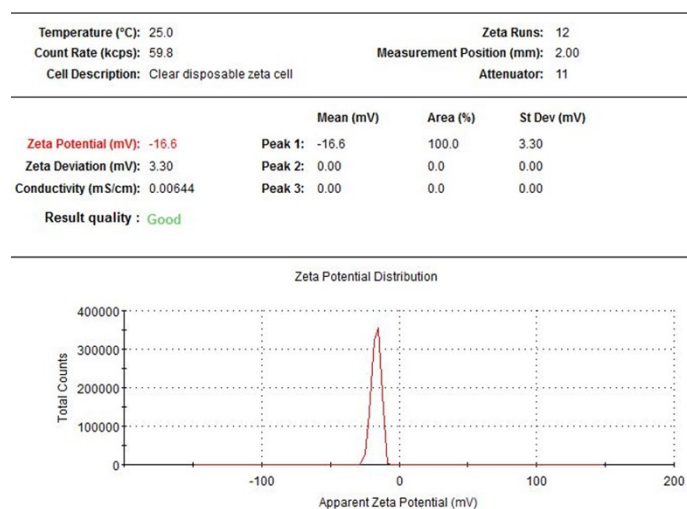

**Fig. S8.** The zeta potential distribution of TGL2.

|                                              |                                 |
|----------------------------------------------|---------------------------------|
| Temperature (°C): 25.0                       | Zeta Runs: 13                   |
| Count Rate (kcps): 117.4                     | Measurement Position (mm): 2.00 |
| Cell Description: Clear disposable zeta cell | Attenuator: 10                  |

  

|                               | Mean (mV)     | Area (%) | St Dev (mV) |
|-------------------------------|---------------|----------|-------------|
| Zeta Potential (mV): -2.54    | Peak 1: -2.54 | 100.0    | 2.90        |
| Zeta Deviation (mV): 2.90     | Peak 2: 0.00  | 0.0      | 0.00        |
| Conductivity (mS/cm): 0.00232 | Peak 3: 0.00  | 0.0      | 0.00        |

Result quality : Good

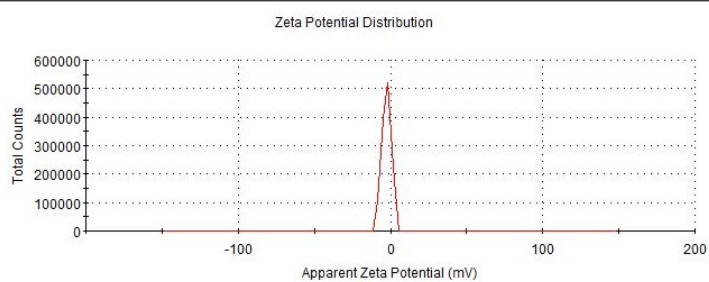

**Fig. S9.** The zeta potential distribution of FOX-7.

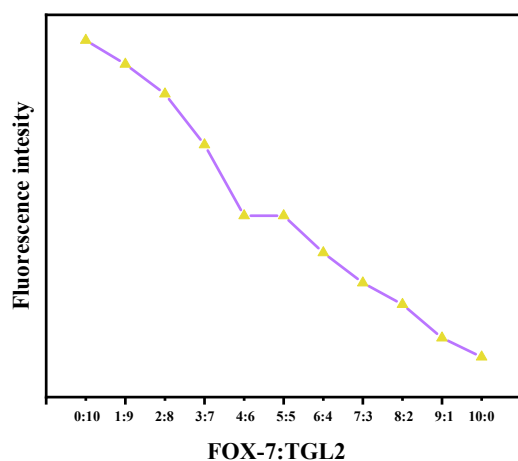

**Fig. S10.** Job's plot of compound TGL1 with FOX-7 (TGL1+FOX-7= $1 \times 10^{-5}$ M) in DMSO/H<sub>2</sub>O (1:9, v/v).

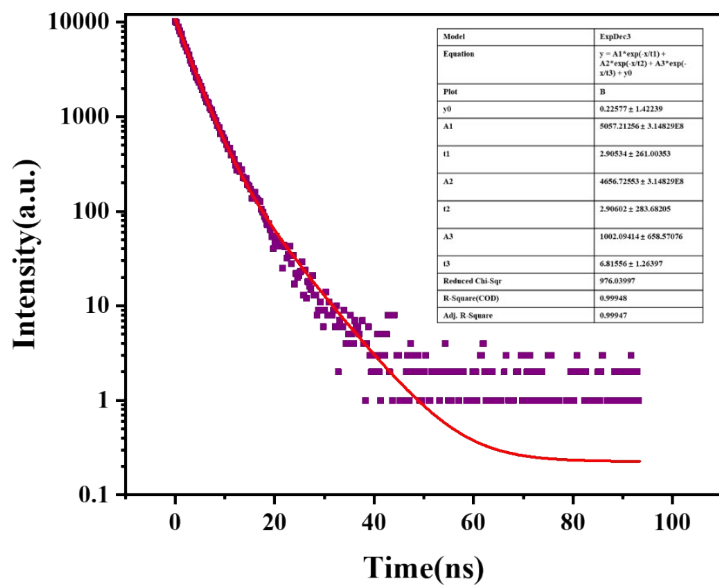

Fig. S11. Lifetime decay profiles of TGL1.

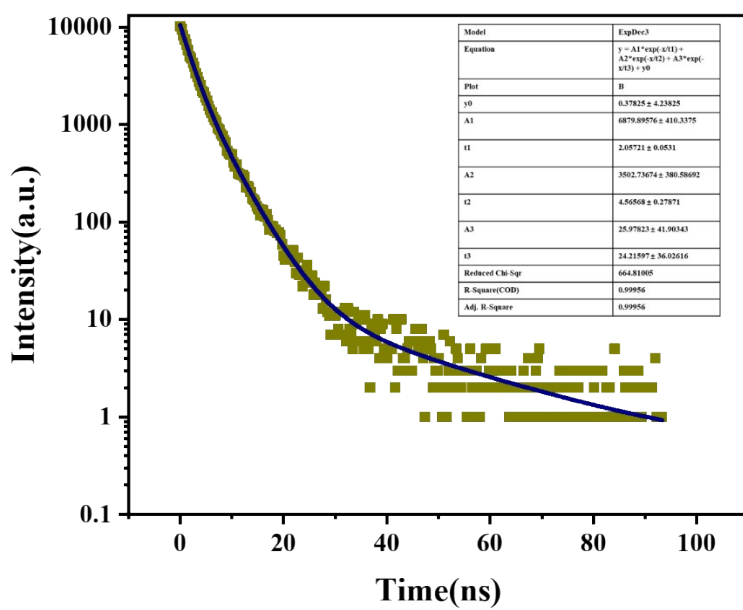

Fig. S12. Lifetime decay profiles of TGL2.

|                                             |                                 |
|---------------------------------------------|---------------------------------|
| Temperature (°C): 25.0                      | Duration Used (s): 60           |
| Count Rate (kcps): 313.3                    | Measurement Position (mm): 4.65 |
| Cell Description: Disposable sizing cuvette | Attenuator: 11                  |

  

|                         | Size (d.nm):  | % Intensity: | St Dev (d.nm): |
|-------------------------|---------------|--------------|----------------|
| Z-Average (d.nm): 321.7 | Peak 1: 526.3 | 81.0         | 221.0          |
| Pdi: 0.286              | Peak 2: 135.0 | 19.0         | 32.15          |
| Intercept: 0.945        | Peak 3: 0.000 | 0.0          | 0.000          |

Result quality : **Good**

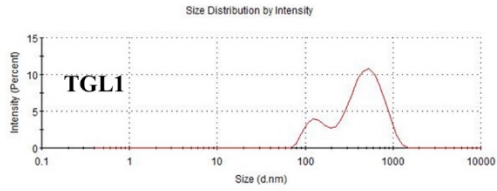

|                                             |                                 |
|---------------------------------------------|---------------------------------|
| Temperature (°C): 25.0                      | Duration Used (s): 60           |
| Count Rate (kcps): 278.5                    | Measurement Position (mm): 4.65 |
| Cell Description: Disposable sizing cuvette | Attenuator: 11                  |

  

|                        | Size (d.nm):  | % Intensity: | St Dev (d.nm): |
|------------------------|---------------|--------------|----------------|
| Z-Average (d.nm): 3057 | Peak 1: 3260  | 100.0        | 1163           |
| Pdi: 0.253             | Peak 2: 0.000 | 0.0          | 0.000          |
| Intercept: 0.931       | Peak 3: 0.000 | 0.0          | 0.000          |

Result quality : **Good**

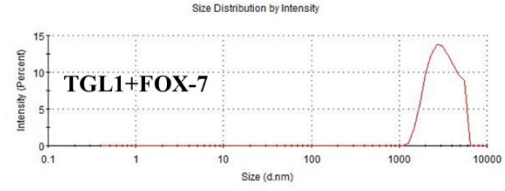

|                                             |                                 |
|---------------------------------------------|---------------------------------|
| Temperature (°C): 25.0                      | Duration Used (s): 60           |
| Count Rate (kcps): 381.6                    | Measurement Position (mm): 4.65 |
| Cell Description: Disposable sizing cuvette | Attenuator: 11                  |

  

|                        | Size (d.nm):  | % Intensity: | St Dev (d.nm): |
|------------------------|---------------|--------------|----------------|
| Z-Average (d.nm): 1130 | Peak 1: 298.6 | 100.0        | 29.01          |
| Pdi: 1.000             | Peak 2: 0.000 | 0.0          | 0.000          |
| Intercept: 1.14        | Peak 3: 0.000 | 0.0          | 0.000          |

Result quality : **Refer to quality report**

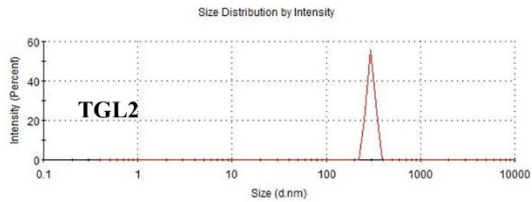

|                                             |                                 |
|---------------------------------------------|---------------------------------|
| Temperature (°C): 25.0                      | Duration Used (s): 70           |
| Count Rate (kcps): 178.8                    | Measurement Position (mm): 4.65 |
| Cell Description: Disposable sizing cuvette | Attenuator: 10                  |

  

|                         | Size (d.nm):  | % Intensity: | St Dev (d.nm): |
|-------------------------|---------------|--------------|----------------|
| Z-Average (d.nm): 561.9 | Peak 1: 335.4 | 58.2         | 72.67          |
| Pdi: 0.423              | Peak 2: 1579  | 39.6         | 454.5          |
| Intercept: 0.979        | Peak 3: 5378  | 2.3          | 323.9          |

Result quality : **Good**

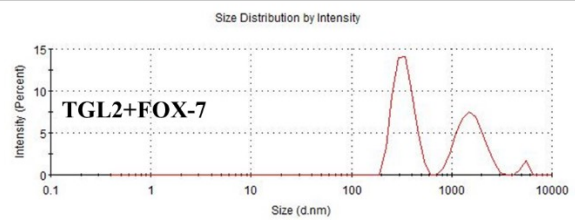

**Fig. S13. Probes particle size in the presence or absence of FOX-7. (DMSO/H<sub>2</sub>O=1:9, 10<sup>-5</sup>M)**

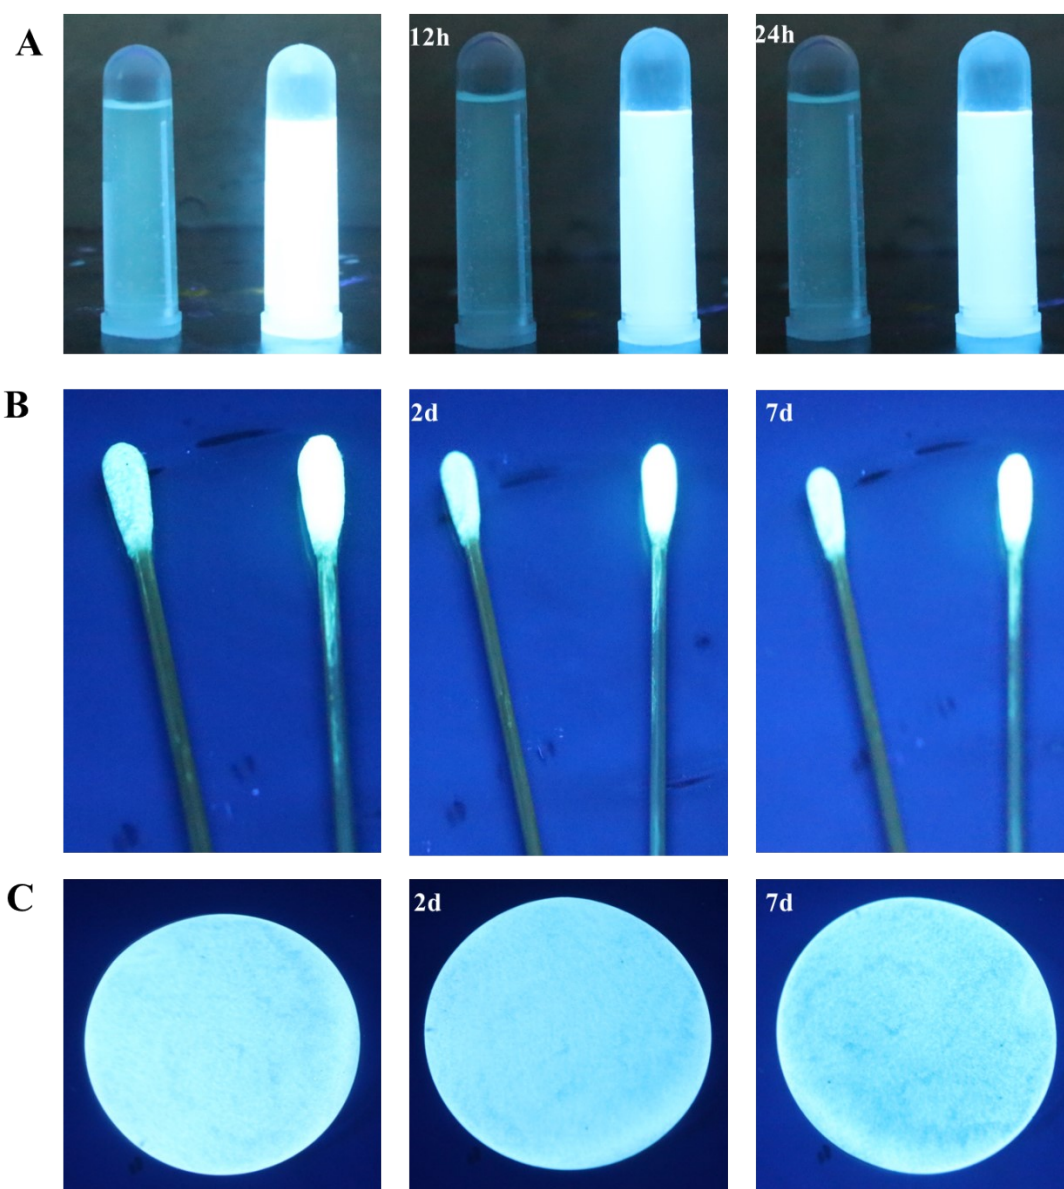

**Fig. S14.** (A) Images of probes in DMSO/H<sub>2</sub>O mixtures with  $f_w$  of 90% , Concentration:  $10^{-5}M$ . Left: TGL1; Right: TGL2. (B): Cotton swabs treated with TGL1 solution. (C): Filter paper treated with TGL1 solution.

**Table S1**

Probe solutions with different water content ( $10^{-5}M$ ).

| $f_w(\text{vol}\%)$                         | 0% | 10% | 20%  | 30%  | 40%  | 50%  | 60%  | 70%  | 80%  | 90%  |
|---------------------------------------------|----|-----|------|------|------|------|------|------|------|------|
| Probes solution( $10^{-3}M$ ) $\mu\text{L}$ | 50 | 50  | 50   | 50   | 50   | 50   | 50   | 50   | 50   | 50   |
| Deionized water $\mu\text{L}$               | 0  | 500 | 1000 | 1500 | 2000 | 2500 | 3000 | 3500 | 4000 | 4500 |

|                               |      |      |      |      |      |      |      |      |     |     |
|-------------------------------|------|------|------|------|------|------|------|------|-----|-----|
| <b>DMSO <math>\mu</math>L</b> | 4950 | 4450 | 3950 | 3450 | 2950 | 2450 | 1950 | 1450 | 950 | 450 |
|-------------------------------|------|------|------|------|------|------|------|------|-----|-----|

**Table S2**

Comparison between present method and other fluorescent nano-sensing methods mentioned in the introduction.

| <b>Refs</b> | <b>Analyte</b> | <b>LOD</b>              | <b>Quenching constant</b>         |
|-------------|----------------|-------------------------|-----------------------------------|
| 2           | TNT            | 0.3ppm                  | —                                 |
| 3           | Teryl          | $1 \times 10^{-4}$ M    | —                                 |
| 4           | TNP            | —                       | $0.26 \times 10^5 \text{ M}^{-1}$ |
| 5           | TNT,DNT        | —                       | —                                 |
| 16          | TNP            | $8 \times 10^{-7}$ M    | —                                 |
| 20          | TNP            | $5 \times 10^{-4}$ M    | $4.4 \times 10^5 \text{ M}^{-1}$  |
| 21          | TNP            | $1 \times 10^{-5}$ M    | $6.8 \times 10^5 \text{ M}^{-1}$  |
| 22          | TNP            | $5 \times 10^{-3}$ M    | $0.3 \times 10^5 \text{ M}^{-1}$  |
| 28          | NB             | 1.11ppm                 | $0.87 \times 10^5 \text{ M}^{-1}$ |
| 29          | TNP            | 5ppm                    | $0.53 \times 10^5 \text{ M}^{-1}$ |
| 30          | TNT            | —                       | $0.75 \times 10^5 \text{ M}^{-1}$ |
| 31          | TNP            | 0.6ppm                  | $3.5 \times 10^5 \text{ M}^{-1}$  |
| 34          | FOX-7          | $1.9 \times 10^{-4}$ M  | —                                 |
| 37          | TNP            | $1.8 \times 10^{-3}$ M  | $0.56 \times 10^5 \text{ M}^{-1}$ |
| 38          | TNP            | $7.26 \times 10^{-5}$ M | —                                 |
| 40          | TNP            | —                       | $0.15 \times 10^5 \text{ M}^{-1}$ |
| 41          | TNT            | —                       | $0.85 \times 10^5 \text{ M}^{-1}$ |
| TGL1        | FOX-7          | $2.32 \times 10^{-6}$ M | $1.05 \times 10^5 \text{ M}^{-1}$ |
| TGL2        | FOX-7          | $5.76 \times 10^{-7}$ M | $4.22 \times 10^5 \text{ M}^{-1}$ |
